# Supplementary material for: Alkali metal decorated C60 fullerenes as promising materials for delivery of the 5-fluorouracil anticancer drug: a DFT approach
Source: Royal Society of Chemistry journal article supplement (doi:10.1039/d1ra09153k), 2022-01-01

## “Supplementary Material”

# Alkali metal decorated C<sub>60</sub> fullerenes as promising materials for delivery of anticancer 5-fluorouracil drug: A DFT approach

Mehdi D. Esrafil<sup>\*,a</sup>, Adnan Ali Khan<sup>b,c</sup>

<sup>a</sup> Department of Chemistry, Faculty of Basic Sciences, University of Maragheh, P.O. Box 55136-553, Maragheh, Iran

<sup>b</sup> Centre for Computational Materials Science, University of Malakand, Chakdara, Pakistan

<sup>c</sup> Department of Chemistry, University of Malakand, Chakdara, Pakistan

\* Corresponding author. E-mail: [esrafil@maragheh.ac.ir](mailto:esrafil@maragheh.ac.ir) (M. D. Esrafil).

**Figure S1.** The energy profile for the migration of the Li atom from above the hexagon ring to neighboring pentagon ring. The IS, TS and FS shows the initial state, transition state and final state, respectively.

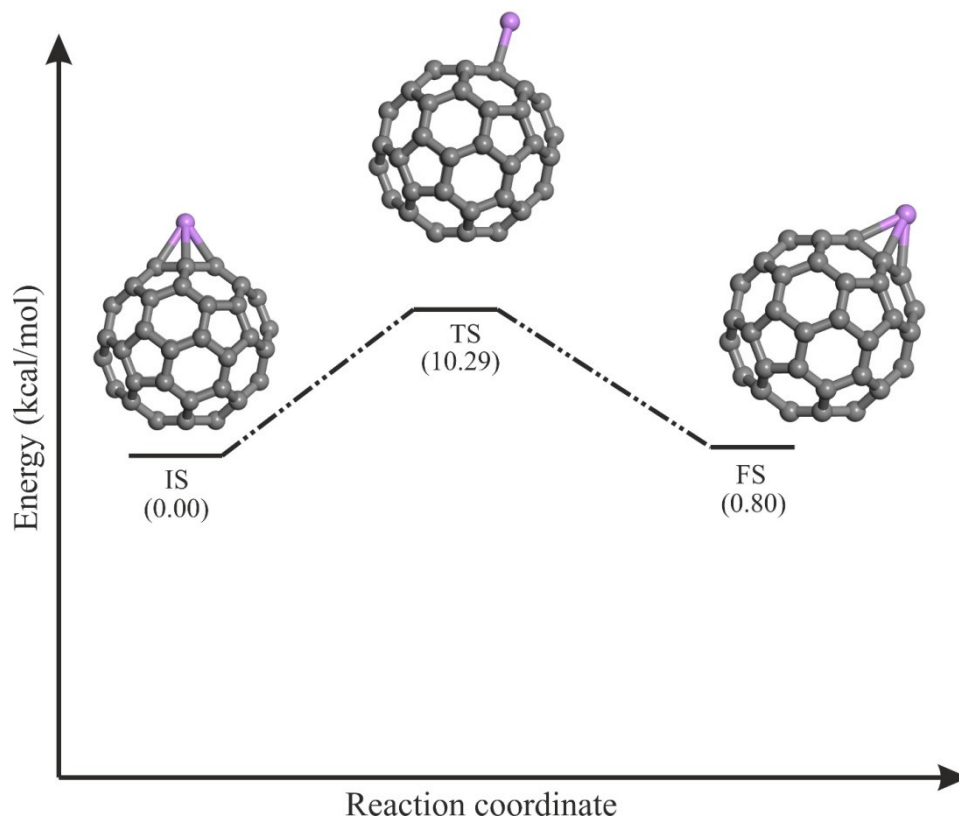

**Figure S2.** The final structure of (a)  $\text{Li}_{12}/\text{C}_{60}$ , (b)  $\text{Na}_6/\text{C}_{60}$  and (c)  $\text{K}_6/\text{C}_{60}$  after the MD simulations at 300 K and for 5000 fs

(a)

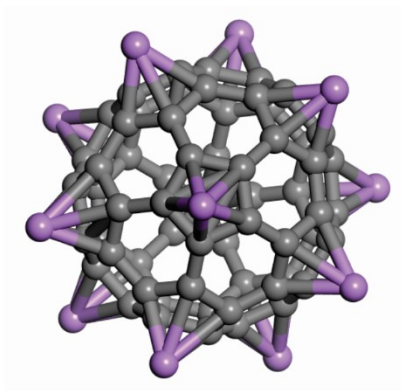

(b)

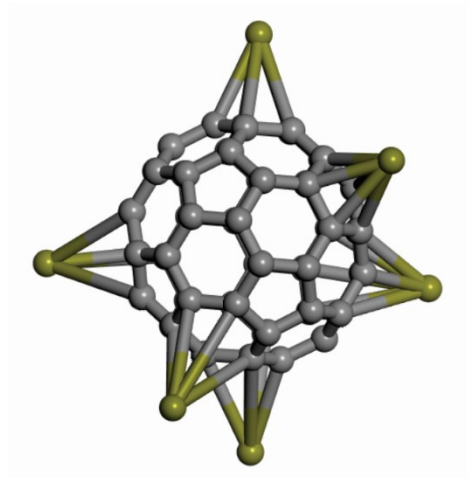

(c)

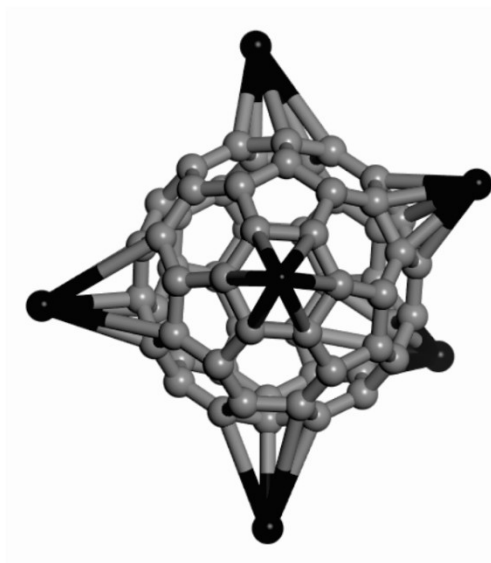

Supplement: d1ra09153k1.pdf [file d1ra09153k1.pdf]
